# Supplementary material
Source: PubMed Central journal article supplement (PMC6108580)
Supplement: EHP2727.s001.acco.pdf [file EHP2727.s001.acco.pdf]

**Note to readers with disabilities:** *EHP* strives to ensure that all journal content is accessible to all readers. However, some figures and Supplemental Material published in *EHP* articles may not conform to [508 standards](#) due to the complexity of the information being presented. If you need assistance accessing journal content, please contact [ehp508@niehs.nih.gov](mailto:ehp508@niehs.nih.gov). Our staff will work with you to assess and meet your accessibility needs within 3 working days.

### **Supplemental Material**

#### **Evaluation and Management Strategies for Per- and Polyfluoroalkyl Substances (PFASs) in Drinking Water Aquifers: Perspectives from Impacted U.S. Northeast Communities**

Jennifer L. Guelfo, Thomas Marlow, David M. Klein, David A. Savitz, Scott Frickel, Michelle Crimi, and Eric M. Suuberg

#### **Table of Contents**

**Table S1.** Research translation approach with Northeast US PFAS stakeholders.

**Table S2.** Information resources for potential PFAS sources in Rhode Island.

#### **References**

Table S1. Research translation approach with Northeast US PFAS stakeholders

| Event (Date)    | Stakeholder participants (State)                               | Format <sup>a</sup> | Topics addressed <sup>b</sup> | No. attendees |
|-----------------|----------------------------------------------------------------|---------------------|-------------------------------|---------------|
| 4/2016-present  | State analytical laboratory                                    | 1 to 1 guidance     | 1                             | 3             |
| 4/2016-present  | Federal research laboratory                                    | 1 to 1 guidance     | 1                             | 2             |
| 5/23/2016       | Federal and State regulators                                   | Workshop            | 2-7                           | 130           |
| 8/3/2016        | Federal and state regulators, consultants, academics, industry | Webinar             | 1                             | 237           |
| 9/21/2016       | Federal and state regulators, consultants, academics, industry | Webinar             | 2-4                           | 204           |
| 10/2016-present | State drinking water authority                                 | 1 to 1 guidance     | 1,3                           | 10            |
| 10/3/2016       | Federal and state regulators, consultants, academics, industry | Webinar             | 4,6                           | 141           |
| 11/30/2016      | Federal and state regulators, consultants, academics, industry | Webinar             | 3                             | 235           |
| 12/14/2016      | Federal and state regulators, consultants, academics, industry | Webinar             | 5                             | 194           |
| May 8-10, 2017  | Federal and state regulators, consultants, academics, industry | Workshop (3 events) | 2-7                           | 331           |

<sup>a</sup> Workshops and webinars were coordinated in partnership with the Northeast Waste Management Officials' Association (NEWMOA); detailed agendas and presentations for these events can be found at <http://www.newmoa.org>.

<sup>b</sup> Topics: 1) Sampling and analysis; 2) Uses, chemistry, terminology; 3) Fate and transport; 4) Toxicology; 5) Treatment and remediation; 6) Regulatory limits; 7) Regulator case studies from impacted communities.

Table S2 Information resources for potential PFAS sources in Rhode Island

| PFAS Source Category <sup>a</sup> | Resource <sup>b</sup>                                                           |
|-----------------------------------|---------------------------------------------------------------------------------|
| Airports                          | RIGIS (Rhode Island Department of Transportation 2013)                          |
| Fire stations                     | RIGIS (URI Environmental Data Center 2017)                                      |
| DoD AFFF areas                    | (Department of Defense 2015)                                                    |
| Public/municipal FTAs             | Web search, personal communications with regulators                             |
| Solid waste facilities            | RIGIS (RI Statewide Planning, Department of Administration 2015)                |
| Industrial/manufacturing          | Rhode Island Directory of Manufacturers, various dates (1953-2015) <sup>c</sup> |
| Textiles                          | SIC 22-23, Directory of Manufacturers                                           |
| Furniture                         | SIC 25, Directory of Manufacturers                                              |
| Paper                             | SIC 26, Directory of Manufacturers                                              |
| Chemicals                         | SIC 28, Directory of Manufacturers                                              |
| Petroleum refining                | SIC 29, Directory of Manufacturers                                              |
| Rubber/plastics                   | SIC 30, Directory of Manufacturers                                              |
| Fabricated metal                  | SIC 34, Directory of Manufacturers                                              |
| Electronics                       | SIC 36, Directory of Manufacturers                                              |

Rhode Island Geographic Information Systems (RIGIS, <http://www.rigis.org>); University of Rhode Island (URI); Department of Defense (DoD); fire training area (FTA); Rhode Island (RI); standard industrial classification (SIC)

<sup>a</sup> Represents PFAS source data publicly available in the state of Rhode Island. Additional source types such as biosolids applications sites may be available in other regions.

<sup>b</sup> The compilation of a database of current and former manufacturing/industrial sites is described in the Methods and Approach.

<sup>c</sup> Manufacturing directory citations: (Harris Infosource 2002; Harris Publishing Co. 1998; MNI 2012; RIEDC 1953)

## References

Department of Defense. 2015. DoD Inventory of Fire/Crash Training Area Sites. Available: <https://assets.documentcloud.org/documents/2647381/List-of-Fire-amp-Crash-Training-Areas-EOY14.pdf> [5/18/16].

Harris Infosource. 2002. *Harris Directory of Rhode Island Businesses, 2002-2010*. Harris InfoSource: Twinsburg, OH.

Harris Publishing Co. 1998. *Harris Rhode Island Manufacturers Directory*. Harris Publishing Co: Twinsburg, OH.

MNI. 2012. *Rhode Island Manufacturers Register 2012*. Manufacturers News Inc.:Evanston, Illinois.

Rhode Island Department of Transportation. 2013. *Airports*. Rhode Island Geographic Information Systems:Providence, RI. Available: <http://www.rigis.org> [accessed 4/30/16].

RI Statewide Planning, Department of Administration. 2015. *Active Solid Waste Facility Sites*. Rhode Island Statewide Planning:Providence, RI. Available: <http://www.rigis.org> [accessed 4/30/16].

RIEDC. 1953. *Rhode Island Directory of Manufacturers, 1953-1994*. Rhode Island Department of Economic Development:Providence, RI.

USEPA. 2009. Final report: PFOS chromium electroplater study. 1–31. Available: [http://www.in.gov/idem/ctap/files/plating\\_chromium\\_pfos\\_study.pdf](http://www.in.gov/idem/ctap/files/plating_chromium_pfos_study.pdf) [accessed 5/11/16].
